# Supplementary material
Source: publisher figshare collection journal article supplement (https://acs.figshare.com/ndownloader/files/4665664)
Supplement: Supplementary file 1 [file 4665664]

 
data_07jul10a 
 
_audit_creation_method            SHELXL-97 
_chemical_name_systematic 
; 
 ? 
; 
_chemical_name_common             ? 
_chemical_melting_point           ? 
_chemical_formula_moiety          ? 
_chemical_formula_sum 
 'C72 H15.65 Br Cl9 D3 N O8.83' 
_chemical_formula_weight          1440.73 
 
loop_ 
 _atom_type_symbol 
 _atom_type_description 
 _atom_type_scat_dispersion_real 
 _atom_type_scat_dispersion_imag 
 _atom_type_scat_source 
 'C'  'C'   0.0033   0.0016 
 'International Tables Vol C Tables 4.2.6.8 and 6.1.1.4' 
 'D'  'D'   0.0000   0.0000 
 'International Tables Vol C Tables 4.2.6.8 and 6.1.1.4' 
 'N'  'N'   0.0061   0.0033 
 'International Tables Vol C Tables 4.2.6.8 and 6.1.1.4' 
 'O'  'O'   0.0106   0.0060 
 'International Tables Vol C Tables 4.2.6.8 and 6.1.1.4' 
 'Cl'  'Cl'   0.1484   0.1585 
 'International Tables Vol C Tables 4.2.6.8 and 6.1.1.4' 
 'Br'  'Br'  -0.2901   2.4595 
 'International Tables Vol C Tables 4.2.6.8 and 6.1.1.4' 
 'H'  'H'   0.0000   0.0000 
 'International Tables Vol C Tables 4.2.6.8 and 6.1.1.4' 
 
_symmetry_cell_setting            'Triclinic' 
_symmetry_space_group_name_H-M    'P -1' 
 
loop_ 
 _symmetry_equiv_pos_as_xyz 
 'x, y, z' 
 '-x, -y, -z' 
 
_cell_length_a                    14.3254(2) 
_cell_length_b                    14.6236(2) 
_cell_length_c                    15.6704(3) 
_cell_angle_alpha                 78.9479(9) 
_cell_angle_beta                  67.0876(9) 
_cell_angle_gamma                 62.6231(7) 
_cell_volume                      2684.79(7) 
_cell_formula_units_Z             2 
_cell_measurement_temperature     200 
_cell_measurement_reflns_used     37790
_cell_measurement_theta_min       3.395
_cell_measurement_theta_max       27.485
 
_exptl_crystal_description        'block' 
_exptl_crystal_colour             'deep red' 
_exptl_crystal_size_max           0.50 
_exptl_crystal_size_mid           0.50 
_exptl_crystal_size_min           0.28 
_exptl_crystal_density_meas       ? 
_exptl_crystal_density_diffrn     1.782 
_exptl_crystal_density_method     'not measured' 
_exptl_crystal_F_000              1433 
_exptl_absorpt_coefficient_mu     1.285 
_exptl_absorpt_correction_type    'multi-scan' 
_exptl_absorpt_correction_T_min   0.599
_exptl_absorpt_correction_T_max   0.708
_exptl_absorpt_process_details
;
multi-scan from symmetry-related measurements 
 Sortav (Blessing 1995, 1997)
;
 
_exptl_special_details 
; 
 ? 
; 
 
_diffrn_ambient_temperature       200 
_diffrn_radiation_wavelength      0.71073 
_diffrn_radiation_type            MoK\a 
_diffrn_radiation_source          'fine-focus sealed tube' 
_diffrn_radiation_monochromator   graphite 
_diffrn_measurement_device_type   'NONIUS KappaCCD' 
_diffrn_measurement_method        'CCD' 
_diffrn_detector_area_resol_mean  9 
_diffrn_standards_number          ? 
_diffrn_standards_interval_count  ? 
_diffrn_standards_interval_time   ? 
_diffrn_standards_decay_%         none 
_diffrn_reflns_number             47274 
_diffrn_reflns_av_R_equivalents   0.0575 
_diffrn_reflns_av_sigmaI/netI     0.0635 
_diffrn_reflns_limit_h_min        -18 
_diffrn_reflns_limit_h_max        18 
_diffrn_reflns_limit_k_min        -18 
_diffrn_reflns_limit_k_max        19 
_diffrn_reflns_limit_l_min        -20 
_diffrn_reflns_limit_l_max        20 
_diffrn_reflns_theta_min          3.41 
_diffrn_reflns_theta_max          27.52 
_reflns_number_total              12239 
_reflns_number_gt                 7822 
_reflns_threshold_expression      >2sigma(I) 
 
_computing_data_collection        'KappaCCD (Nonius B. V., 1998)' 
_computing_cell_refinement        'HKL Scalepack (Otwinowski & Minor, 1997)' 
_computing_data_reduction
'HKL Denzo (Otwinowski & Minor, 1997) & maXus (Mackay et al., 1998)'
_computing_structure_solution     'SHELXS-97 (Sheldrick, 1997)' 
_computing_structure_refinement   'SHELXL-97 (Sheldrick, 1997)' 
_computing_molecular_graphics     'Bruker SHELXTL V5.1 (Sheldrick, 1998)' 
_computing_publication_material   'SHELXL-97 (Sheldrick, 1997)' 

_publ_section_references
;
collect:
"Collect" data collection software, Nonius B.V., Delft, The Netherlands, 1998.

HKL Scalepack & HKL Denzo:
Z. Otwinowski and W. Minor, " Processing of X-ray Diffraction Data Collected
in Oscillation Mode ", Methods in Enzymology, Volume 276: Macromolecular
Crystallography, part A, p.307-326, 1997,C.W. Carter, Jr. & R.M. Sweet,
Eds., Academic Press.

absorption correction:
R.H. Blessing (1995) Acta Cryst. A51, 33-37.
R.H. Blessing (1997) J.Appl. Cryst. 30, 421-426.

maXus: 
S.Mackay, C.J.Gilmore, C.Edwards, M. Tremayne, N. Stuart, K.Shankland
"maXus: a computer program for the solution and refinement of crystal
structures from diffraction data", University of Glasgow, Scotland, UK,
Nonius BV, Delft, The Netherlands and MacScience Co. Ltd., Yokohama,
Japan (1998).

Sheldrick, G. M. (1998). SHELXTL Version 5.1. Bruker Analytical X-ray
Instruments Inc., Madison, Wisconsin, USA.

Sheldrick, G. M. (1997). SHELX-97. PC Version. University of Goettingen,
Germany.
;
 
_refine_special_details 
; 
 Refinement of F^2^ against ALL reflections.  The weighted R-factor wR and 
 goodness of fit S are based on F^2^, conventional R-factors R are based 
 on F, with F set to zero for negative F^2^. The threshold expression of 
 F^2^ > 2sigma(F^2^) is used only for calculating R-factors(gt) etc. and is 
 not relevant to the choice of reflections for refinement.  R-factors based 
 on F^2^ are statistically about twice as large as those based on F, and R- 
 factors based on ALL data will be even larger. 
; 
 
_refine_ls_structure_factor_coef  Fsqd  
_refine_ls_matrix_type            full 
_refine_ls_weighting_scheme       calc  
_refine_ls_weighting_details 
 'calc w=1/[\s^2^(Fo^2^)+(0.0621P)^2^+0.0000P] where P=(Fo^2^+2Fc^2^)/3' 
_atom_sites_solution_primary      direct 
_atom_sites_solution_secondary    difmap 
_atom_sites_solution_hydrogens    geom 
_refine_ls_hydrogen_treatment     'constraint' 
_refine_ls_extinction_method      none 
_refine_ls_extinction_coef        ? 
_refine_ls_number_reflns          12239 
_refine_ls_number_parameters      858 
_refine_ls_number_restraints      12 
_refine_ls_R_factor_all           0.0869 
_refine_ls_R_factor_gt            0.0465 
_refine_ls_wR_factor_ref          0.1213 
_refine_ls_wR_factor_gt           0.1108 
_refine_ls_goodness_of_fit_ref    1.060 
_refine_ls_restrained_S_all       1.067 
_refine_ls_shift/su_max           0.001 
_refine_ls_shift/su_mean          0.000 
 
loop_ 
 _atom_site_label 
 _atom_site_type_symbol 
 _atom_site_fract_x 
 _atom_site_fract_y 
 _atom_site_fract_z 
 _atom_site_U_iso_or_equiv 
 _atom_site_adp_type 
 _atom_site_occupancy 
 _atom_site_symmetry_multiplicity 
 _atom_site_calc_flag 
 _atom_site_refinement_flags 
 _atom_site_disorder_assembly 
 _atom_site_disorder_group 
Br1 Br -0.21589(3) 1.63159(2) -0.11468(2) 0.04278(11) Uani 1 1 d . . . 
O1 O -0.01670(14) 1.27244(13) 0.19932(11) 0.0320(4) Uani 1 1 d . . . 
O2 O -0.04805(15) 1.26953(13) 0.35200(12) 0.0344(4) Uani 1 1 d . . . 
O3 O 0.31674(15) 1.13274(14) 0.03156(12) 0.0338(4) Uani 1 1 d . . . 
H3 H 0.2779 1.1637 -0.0024 0.051 Uiso 1 1 calc R . . 
O4 O 0.04317(16) 1.06597(15) 0.06546(14) 0.0449(5) Uani 1 1 d . . . 
O5 O -0.13540(17) 1.02406(16) 0.21628(14) 0.0466(5) Uani 1 1 d . . . 
O6 O -0.07064(15) 1.07859(14) 0.35169(13) 0.0365(5) Uani 1 1 d . . . 
O7 O 0.17714(15) 1.14186(13) 0.37235(11) 0.0305(4) Uani 1 1 d . . . 
O8 O 0.24565(16) 1.19650(14) 0.31230(12) 0.0344(4) Uani 1 1 d . . . 
O9 O 0.2460(2) 0.8009(2) 0.21830(18) 0.0628(13) Uani 0.826(8) 1 d P . . 
N1 N 0.08788(18) 1.24846(16) 0.03988(14) 0.0293(5) Uani 1 1 d . . . 
C1 C 0.0736(2) 1.21939(19) 0.12326(17) 0.0268(6) Uani 1 1 d . . . 
C2 C 0.0096(2) 1.22862(19) 0.27963(18) 0.0282(6) Uani 1 1 d . . . 
C3 C 0.1180(2) 1.13560(18) 0.24907(16) 0.0232(5) Uani 1 1 d . . . 
C4 C 0.1547(2) 1.13091(19) 0.15702(16) 0.0249(6) Uani 1 1 d . . . 
C5 C 0.2726(2) 1.06646(19) 0.09501(16) 0.0266(6) Uani 1 1 d . . . 
C6 C 0.3019(2) 0.97273(19) 0.03913(15) 0.0262(6) Uani 1 1 d . . . 
C7 C 0.2394(2) 0.9402(2) 0.01569(16) 0.0300(6) Uani 1 1 d . . . 
C8 C 0.1129(2) 0.9796(2) 0.04840(17) 0.0328(6) Uani 1 1 d . . . 
C9 C 0.0941(2) 0.8828(2) 0.06427(18) 0.0336(6) Uani 1 1 d . . . 
C10 C 0.0157(2) 0.8632(2) 0.14080(19) 0.0343(7) Uani 1 1 d . . . 
C11 C -0.0698(2) 0.9361(2) 0.2194(2) 0.0368(7) Uani 1 1 d . . . 
C12 C -0.0513(2) 0.8710(2) 0.30487(19) 0.0332(6) Uani 1 1 d . . . 
C13 C -0.0324(2) 0.8966(2) 0.37460(17) 0.0307(6) Uani 1 1 d . . . 
C14 C -0.0193(2) 0.9929(2) 0.37675(16) 0.0284(6) Uani 1 1 d . . . 
C15 C 0.0807(2) 0.95599(19) 0.40705(15) 0.0259(6) Uani 1 1 d . . . 
C16 C 0.1653(2) 0.98747(19) 0.37746(16) 0.0249(6) Uani 1 1 d . . . 
C17 C 0.1859(2) 1.07497(19) 0.31075(16) 0.0254(6) Uani 1 1 d . . . 
C18 C 0.3067(2) 1.01444(19) 0.24956(17) 0.0245(5) Uani 1 1 d . . . 
C19 C 0.3443(2) 1.01064(19) 0.15578(17) 0.0245(5) Uani 1 1 d . . . 
C20 C 0.4379(2) 0.9202(2) 0.10959(17) 0.0274(6) Uani 1 1 d . . . 
C21 C 0.4141(2) 0.8987(2) 0.03626(16) 0.0286(6) Uani 1 1 d . . . 
C22 C 0.4606(2) 0.7973(2) 0.00888(16) 0.0308(6) Uani 1 1 d . . . 
C23 C 0.3951(2) 0.7636(2) -0.01673(16) 0.0328(6) Uani 1 1 d . . . 
C24 C 0.2869(2) 0.8337(2) -0.01061(16) 0.0332(6) Uani 1 1 d . . . 
C25 C 0.1991(2) 0.7991(2) 0.02109(17) 0.0337(6) Uani 1 1 d . . . 
C26 C 0.2228(2) 0.6977(2) 0.05019(19) 0.0372(7) Uani 1 1 d . . . 
C27 C 0.1424(2) 0.6782(2) 0.1333(2) 0.0369(7) Uani 1 1 d . . . 
C28 C 0.0442(2) 0.7602(2) 0.17769(19) 0.0354(7) Uani 1 1 d . . . 
C29 C 0.0030(2) 0.7644(2) 0.2783(2) 0.0365(7) Uani 1 1 d . . . 
C30 C 0.0623(2) 0.6866(2) 0.32782(19) 0.0356(7) Uani 1 1 d . . . 
C31 C 0.0774(2) 0.7128(2) 0.40363(18) 0.0353(7) Uani 1 1 d . . . 
C32 C 0.0356(2) 0.8164(2) 0.42182(17) 0.0305(6) Uani 1 1 d . . . 
C33 C 0.1015(2) 0.8525(2) 0.44356(16) 0.0294(6) Uani 1 1 d . . . 
C34 C 0.2043(2) 0.7830(2) 0.45083(16) 0.0316(6) Uani 1 1 d . . . 
C35 C 0.2944(2) 0.8139(2) 0.41768(16) 0.0300(6) Uani 1 1 d . . . 
C36 C 0.2744(2) 0.91288(19) 0.38127(16) 0.0270(6) Uani 1 1 d . . . 
C37 C 0.3607(2) 0.92813(19) 0.30107(17) 0.0265(6) Uani 1 1 d . . . 
C38 C 0.4580(2) 0.8437(2) 0.25736(18) 0.0301(6) Uani 1 1 d . . . 
C39 C 0.4985(2) 0.8397(2) 0.15760(18) 0.0296(6) Uani 1 1 d . . . 
C40 C 0.5420(2) 0.7347(2) 0.13186(19) 0.0325(6) Uani 1 1 d . . . 
C41 C 0.5243(2) 0.7139(2) 0.05808(18) 0.0325(6) Uani 1 1 d . . . 
C42 C 0.4976(2) 0.6288(2) 0.06320(18) 0.0346(7) Uani 1 1 d . . . 
C43 C 0.4188(2) 0.6584(2) 0.01627(18) 0.0345(7) Uani 1 1 d . . . 
C44 C 0.3342(2) 0.6263(2) 0.04951(19) 0.0372(7) Uani 1 1 d . . . 
C45 C 0.3225(2) 0.5632(2) 0.13351(19) 0.0374(7) Uani 1 1 d . . . 
C46 C 0.2041(2) 0.5952(2) 0.1846(2) 0.0370(7) Uani 1 1 d . . . 
C47 C 0.1646(2) 0.5994(2) 0.2810(2) 0.0382(7) Uani 1 1 d . . . 
C48 C 0.2419(3) 0.5715(2) 0.32941(19) 0.0381(7) Uani 1 1 d . . . 
C49 C 0.1877(2) 0.6416(2) 0.40586(18) 0.0348(7) Uani 1 1 d . . . 
C50 C 0.2493(2) 0.6760(2) 0.43001(17) 0.0339(7) Uani 1 1 d . . . 
C51 C 0.3683(2) 0.6410(2) 0.38005(18) 0.0347(7) Uani 1 1 d . . . 
C52 C 0.3968(2) 0.7256(2) 0.37319(18) 0.0343(7) Uani 1 1 d . . . 
C53 C 0.4763(2) 0.7408(2) 0.29314(19) 0.0329(6) Uani 1 1 d . . . 
C54 C 0.5290(2) 0.6725(2) 0.21582(19) 0.0332(6) Uani 1 1 d . . . 
C55 C 0.5025(2) 0.5913(2) 0.22201(19) 0.0362(7) Uani 1 1 d . . . 
C56 C 0.4864(2) 0.5679(2) 0.14462(19) 0.0368(7) Uani 1 1 d . . . 
C57 C 0.3968(2) 0.5353(2) 0.17988(19) 0.0373(7) Uani 1 1 d . . . 
C58 C 0.3562(2) 0.5393(2) 0.28002(19) 0.0372(7) Uani 1 1 d . . . 
C59 C 0.4208(2) 0.5744(2) 0.30615(19) 0.0367(7) Uani 1 1 d . . . 
C60 C 0.0097(2) 1.33811(19) 0.01015(17) 0.0273(6) Uani 1 1 d . . . 
C61 C -0.1058(2) 1.3825(2) 0.05547(17) 0.0320(6) Uani 1 1 d . . . 
H61 H -0.1382 1.3524 0.1115 0.038 Uiso 1 1 calc R . . 
C62 C -0.1733(2) 1.4699(2) 0.01958(17) 0.0309(6) Uani 1 1 d . . . 
H62 H -0.2520 1.5006 0.0511 0.037 Uiso 1 1 calc R . . 
C63 C -0.1257(2) 1.51249(19) -0.06267(18) 0.0297(6) Uani 1 1 d . . . 
C64 C -0.0120(2) 1.4692(2) -0.10906(18) 0.0336(6) Uani 1 1 d . . . 
H64 H 0.0198 1.4993 -0.1654 0.040 Uiso 1 1 calc R . . 
C65 C 0.0553(2) 1.3819(2) -0.07308(17) 0.0327(6) Uani 1 1 d . . . 
H65 H 0.1339 1.3511 -0.1054 0.039 Uiso 1 1 calc R . . 
C66 C 0.2442(2) 1.2609(2) 0.37336(19) 0.0354(7) Uani 1 1 d . . . 
C67 C 0.3346(3) 1.2955(2) 0.3084(2) 0.0450(8) Uani 1 1 d . . . 
H67A H 0.3118 1.3357 0.2566 0.067 Uiso 1 1 calc R . . 
H67B H 0.4055 1.2348 0.2846 0.067 Uiso 1 1 calc R . . 
H67C H 0.3444 1.3381 0.3426 0.067 Uiso 1 1 calc R . . 
C68 C 0.2763(3) 1.1984(3) 0.4543(2) 0.0544(9) Uani 1 1 d . . . 
H68A H 0.3506 1.1413 0.4313 0.082 Uiso 1 1 calc R . . 
H68B H 0.2213 1.1710 0.4908 0.082 Uiso 1 1 calc R . . 
H68C H 0.2777 1.2424 0.4933 0.082 Uiso 1 1 calc R . . 
C69 C 0.1294(3) 1.3522(2) 0.4017(2) 0.0459(8) Uani 1 1 d . . . 
H69A H 0.1138 1.3891 0.3462 0.069 Uiso 1 1 calc R . . 
H69B H 0.1287 1.3988 0.4396 0.069 Uiso 1 1 calc R . . 
H69C H 0.0720 1.3274 0.4377 0.069 Uiso 1 1 calc R . . 
C70 C -0.2247(3) 1.5184(3) 0.3799(2) 0.0540(9) Uani 1 1 d . . . 
D70 H -0.1934 1.4429 0.3947 0.065 Uiso 1 1 calc R . . 
Cl1 Cl -0.24520(7) 1.53599(8) 0.27398(6) 0.0623(3) Uani 1 1 d . . . 
Cl2 Cl -0.35289(8) 1.57984(8) 0.46837(6) 0.0813(3) Uani 1 1 d . . . 
Cl3 Cl -0.12896(9) 1.56431(11) 0.37242(8) 0.0997(4) Uani 1 1 d . . . 
C71 C -0.3185(3) 1.2333(2) 0.3248(2) 0.0472(8) Uani 1 1 d . . . 
D71 H -0.2366 1.1877 0.3085 0.057 Uiso 1 1 calc R . . 
Cl4 Cl -0.34996(9) 1.34207(7) 0.38008(7) 0.0722(3) Uani 1 1 d . . . 
Cl5 Cl -0.39310(10) 1.16599(9) 0.39947(8) 0.0861(3) Uani 1 1 d . . . 
Cl6 Cl -0.35079(11) 1.26845(11) 0.22359(7) 0.0992(4) Uani 1 1 d . . . 
C72 C -0.3447(3) 0.9612(3) 0.2594(3) 0.0695(11) Uani 1 1 d D . . 
D72 H -0.3092 1.0039 0.2648 0.083 Uiso 1 1 calc R A 1 
Cl71 Cl -0.44899(19) 1.0413(2) 0.2099(2) 0.0312(6) Uani 0.50 1 d PD B 1 
Cl81 Cl -0.3852(7) 0.9103(7) 0.3623(5) 0.123(3) Uani 0.50 1 d PD B 1 
Cl91 Cl -0.2405(4) 0.8651(3) 0.1738(2) 0.0607(7) Uani 0.50 1 d PD B 1 
Cl72 Cl -0.4397(5) 1.0346(5) 0.2152(4) 0.110(2) Uani 0.50 1 d PD B 2 
Cl82 Cl -0.4264(7) 0.9332(5) 0.3803(4) 0.0988(19) Uani 0.50 1 d PD B 2 
Cl92 Cl -0.2513(5) 0.8413(5) 0.2141(5) 0.180(3) Uani 0.50 1 d PD B 2 
 
loop_ 
 _atom_site_aniso_label 
 _atom_site_aniso_U_11 
 _atom_site_aniso_U_22 
 _atom_site_aniso_U_33 
 _atom_site_aniso_U_23 
 _atom_site_aniso_U_13 
 _atom_site_aniso_U_12 
Br1 0.04291(19) 0.03073(17) 0.05129(19) 0.00570(13) -0.02291(14) -0.00991(14) 
O1 0.0260(10) 0.0292(10) 0.0287(9) -0.0025(8) -0.0079(8) -0.0026(8) 
O2 0.0322(10) 0.0304(10) 0.0270(10) -0.0076(8) -0.0035(8) -0.0052(9) 
O3 0.0294(10) 0.0335(11) 0.0307(10) 0.0043(8) -0.0050(8) -0.0133(9) 
O4 0.0337(11) 0.0336(12) 0.0637(14) -0.0033(10) -0.0206(10) -0.0073(10) 
O5 0.0347(12) 0.0429(13) 0.0585(13) -0.0066(10) -0.0171(10) -0.0107(11) 
O6 0.0315(11) 0.0286(11) 0.0467(11) -0.0053(9) -0.0140(9) -0.0082(9) 
O7 0.0373(11) 0.0304(10) 0.0282(9) -0.0044(8) -0.0076(8) -0.0196(9) 
O8 0.0439(12) 0.0336(11) 0.0331(10) -0.0016(8) -0.0092(9) -0.0255(9) 
O9 0.066(2) 0.068(2) 0.0547(19) -0.0034(14) -0.0175(15) -0.0310(17) 
N1 0.0286(12) 0.0299(12) 0.0291(12) -0.0010(9) -0.0117(10) -0.0105(10) 
C1 0.0270(14) 0.0257(14) 0.0254(13) -0.0014(10) -0.0071(11) -0.0106(11) 
C2 0.0284(14) 0.0254(14) 0.0311(15) 0.0008(11) -0.0102(12) -0.0122(12) 
C3 0.0228(13) 0.0214(13) 0.0266(13) -0.0019(10) -0.0078(10) -0.0105(11) 
C4 0.0228(13) 0.0233(13) 0.0290(14) -0.0009(10) -0.0078(11) -0.0107(11) 
C5 0.0261(14) 0.0267(14) 0.0235(13) 0.0007(10) -0.0044(11) -0.0122(11) 
C6 0.0267(14) 0.0294(14) 0.0171(12) 0.0001(10) -0.0031(10) -0.0116(12) 
C7 0.0335(15) 0.0342(15) 0.0195(12) -0.0003(11) -0.0082(11) -0.0131(13) 
C8 0.0344(16) 0.0423(18) 0.0251(13) -0.0001(12) -0.0162(12) -0.0143(14) 
C9 0.0337(15) 0.0400(17) 0.0333(15) -0.0057(12) -0.0199(13) -0.0121(13) 
C10 0.0303(15) 0.0422(17) 0.0402(16) -0.0074(13) -0.0171(13) -0.0167(13) 
C11 0.0268(15) 0.0411(18) 0.0492(17) -0.0062(14) -0.0130(13) -0.0179(14) 
C12 0.0184(13) 0.0366(16) 0.0425(16) -0.0071(12) -0.0016(12) -0.0148(12) 
C13 0.0209(14) 0.0362(16) 0.0293(14) -0.0066(11) 0.0028(11) -0.0145(12) 
C14 0.0233(14) 0.0329(16) 0.0226(13) -0.0075(11) 0.0005(11) -0.0110(12) 
C15 0.0261(14) 0.0252(14) 0.0185(12) -0.0085(10) 0.0004(10) -0.0082(11) 
C16 0.0289(14) 0.0246(13) 0.0221(12) -0.0060(10) -0.0093(11) -0.0096(11) 
C17 0.0281(14) 0.0236(13) 0.0267(13) -0.0052(10) -0.0091(11) -0.0113(11) 
C18 0.0245(13) 0.0235(13) 0.0308(14) -0.0022(10) -0.0098(11) -0.0135(11) 
C19 0.0193(13) 0.0236(13) 0.0313(14) -0.0006(10) -0.0062(11) -0.0116(11) 
C20 0.0178(13) 0.0297(14) 0.0322(14) -0.0026(11) -0.0023(11) -0.0124(11) 
C21 0.0238(14) 0.0335(15) 0.0217(13) -0.0018(11) 0.0004(10) -0.0130(12) 
C22 0.0229(14) 0.0360(16) 0.0218(13) -0.0087(11) 0.0035(11) -0.0091(12) 
C23 0.0329(16) 0.0357(16) 0.0186(13) -0.0101(11) -0.0010(11) -0.0084(13) 
C24 0.0393(16) 0.0405(17) 0.0194(13) -0.0046(11) -0.0095(12) -0.0158(14) 
C25 0.0391(16) 0.0425(17) 0.0269(14) -0.0110(12) -0.0143(12) -0.0170(14) 
C26 0.0463(18) 0.0380(17) 0.0354(15) -0.0159(13) -0.0139(14) -0.0191(15) 
C27 0.0434(17) 0.0378(17) 0.0437(16) -0.0130(13) -0.0145(14) -0.0246(15) 
C28 0.0308(15) 0.0396(17) 0.0469(17) -0.0094(13) -0.0139(13) -0.0202(14) 
C29 0.0296(15) 0.0425(18) 0.0459(17) -0.0057(13) -0.0064(13) -0.0258(14) 
C30 0.0347(16) 0.0316(16) 0.0438(16) -0.0045(13) -0.0032(13) -0.0238(14) 
C31 0.0400(17) 0.0340(16) 0.0309(14) 0.0007(12) -0.0016(12) -0.0241(14) 
C32 0.0299(15) 0.0309(15) 0.0227(13) -0.0044(11) 0.0041(11) -0.0157(12) 
C33 0.0342(15) 0.0306(15) 0.0173(12) -0.0026(10) -0.0010(11) -0.0144(13) 
C34 0.0444(17) 0.0314(15) 0.0168(12) 0.0011(10) -0.0086(12) -0.0165(13) 
C35 0.0342(15) 0.0338(15) 0.0223(13) -0.0008(11) -0.0136(11) -0.0114(13) 
C36 0.0338(15) 0.0287(14) 0.0245(13) -0.0021(10) -0.0145(11) -0.0140(12) 
C37 0.0274(14) 0.0293(14) 0.0305(14) -0.0045(11) -0.0150(11) -0.0127(12) 
C38 0.0216(14) 0.0330(15) 0.0411(15) -0.0009(12) -0.0168(12) -0.0110(12) 
C39 0.0167(13) 0.0347(16) 0.0355(15) -0.0034(12) -0.0066(11) -0.0104(12) 
C40 0.0175(13) 0.0316(15) 0.0400(15) -0.0038(12) -0.0065(11) -0.0053(12) 
C41 0.0179(13) 0.0309(15) 0.0323(14) -0.0105(11) 0.0020(11) -0.0022(12) 
C42 0.0270(15) 0.0264(15) 0.0320(15) -0.0167(11) 0.0015(12) 0.0000(12) 
C43 0.0313(16) 0.0322(16) 0.0289(14) -0.0169(12) -0.0009(12) -0.0061(13) 
C44 0.0445(18) 0.0303(15) 0.0336(15) -0.0189(12) -0.0076(13) -0.0113(14) 
C45 0.0467(18) 0.0223(14) 0.0411(16) -0.0157(12) -0.0103(14) -0.0115(13) 
C46 0.0446(18) 0.0283(15) 0.0465(17) -0.0098(13) -0.0125(14) -0.0213(14) 
C47 0.0483(18) 0.0267(15) 0.0457(17) -0.0016(12) -0.0100(14) -0.0255(14) 
C48 0.0511(19) 0.0224(14) 0.0402(16) 0.0023(12) -0.0105(14) -0.0205(14) 
C49 0.0443(17) 0.0244(14) 0.0301(14) 0.0044(11) -0.0059(12) -0.0175(13) 
C50 0.0444(18) 0.0290(15) 0.0240(13) 0.0052(11) -0.0097(12) -0.0160(13) 
C51 0.0433(17) 0.0261(15) 0.0335(15) 0.0051(12) -0.0201(13) -0.0103(13) 
C52 0.0382(16) 0.0284(15) 0.0366(15) 0.0020(12) -0.0245(13) -0.0059(13) 
C53 0.0238(14) 0.0347(16) 0.0401(16) -0.0002(12) -0.0202(12) -0.0050(12) 
C54 0.0199(14) 0.0293(15) 0.0429(16) -0.0056(12) -0.0121(12) -0.0015(12) 
C55 0.0274(15) 0.0246(15) 0.0447(17) -0.0047(12) -0.0152(13) 0.0022(12) 
C56 0.0313(16) 0.0193(14) 0.0429(16) -0.0111(12) -0.0075(13) 0.0025(12) 
C57 0.0413(17) 0.0169(14) 0.0430(17) -0.0087(11) -0.0086(14) -0.0057(13) 
C58 0.0443(18) 0.0175(14) 0.0437(17) -0.0012(12) -0.0140(14) -0.0089(13) 
C59 0.0371(16) 0.0210(14) 0.0428(16) 0.0024(12) -0.0173(13) -0.0032(12) 
C60 0.0299(15) 0.0233(14) 0.0280(13) -0.0040(10) -0.0114(11) -0.0082(12) 
C61 0.0367(16) 0.0379(16) 0.0268(14) 0.0037(11) -0.0137(12) -0.0195(13) 
C62 0.0246(14) 0.0344(16) 0.0322(14) -0.0066(12) -0.0105(11) -0.0086(12) 
C63 0.0347(16) 0.0228(14) 0.0348(14) -0.0016(11) -0.0184(12) -0.0092(12) 
C64 0.0355(16) 0.0322(16) 0.0274(14) 0.0003(11) -0.0077(12) -0.0127(13) 
C65 0.0303(15) 0.0318(15) 0.0301(14) -0.0029(11) -0.0073(12) -0.0100(13) 
C66 0.0457(18) 0.0314(16) 0.0396(16) -0.0017(12) -0.0188(13) -0.0212(14) 
C67 0.0448(18) 0.0354(17) 0.066(2) -0.0003(15) -0.0227(16) -0.0232(15) 
C68 0.083(3) 0.051(2) 0.057(2) 0.0135(16) -0.0475(19) -0.038(2) 
C69 0.0482(19) 0.0350(17) 0.0498(18) -0.0101(14) -0.0085(15) -0.0173(15) 
C70 0.047(2) 0.051(2) 0.0420(18) -0.0016(15) -0.0152(15) -0.0026(16) 
Cl1 0.0516(5) 0.0880(7) 0.0524(5) 0.0062(4) -0.0252(4) -0.0307(5) 
Cl2 0.0639(6) 0.0693(7) 0.0532(5) 0.0012(5) 0.0063(5) -0.0044(5) 
Cl3 0.0630(7) 0.1493(12) 0.0962(8) -0.0577(8) -0.0263(6) -0.0328(7) 
C71 0.0368(17) 0.053(2) 0.0482(18) -0.0092(15) -0.0146(14) -0.0131(15) 
Cl4 0.0958(8) 0.0600(6) 0.0757(6) -0.0012(5) -0.0428(6) -0.0344(6) 
Cl5 0.0955(8) 0.0974(8) 0.0804(7) -0.0067(6) -0.0146(6) -0.0642(7) 
Cl6 0.1059(9) 0.1300(11) 0.0495(6) -0.0131(6) -0.0383(6) -0.0267(8) 
C72 0.040(2) 0.062(2) 0.111(3) -0.030(2) -0.032(2) -0.0096(18) 
Cl71 0.0185(9) 0.0315(13) 0.0402(14) -0.0039(10) -0.0076(9) -0.0086(9) 
Cl81 0.141(5) 0.147(5) 0.069(2) 0.021(2) -0.063(3) -0.038(3) 
Cl91 0.0388(13) 0.0537(15) 0.0848(14) -0.0315(11) -0.0258(10) -0.0008(10) 
Cl72 0.150(4) 0.108(4) 0.092(3) 0.017(3) -0.040(3) -0.079(3) 
Cl82 0.150(6) 0.103(3) 0.100(4) 0.037(3) -0.092(4) -0.074(4) 
Cl92 0.065(3) 0.121(5) 0.358(9) -0.144(6) -0.072(5) 0.008(3) 
 
_geom_special_details 
; 
 All esds (except the esd in the dihedral angle between two l.s. planes) 
 are estimated using the full covariance matrix.  The cell esds are taken 
 into account individually in the estimation of esds in distances, angles 
 and torsion angles; correlations between esds in cell parameters are only 
 used when they are defined by crystal symmetry.  An approximate (isotropic) 
 treatment of cell esds is used for estimating esds involving l.s. planes. 
; 
 
loop_ 
 _geom_bond_atom_site_label_1 
 _geom_bond_atom_site_label_2 
 _geom_bond_distance 
 _geom_bond_site_symmetry_2 
 _geom_bond_publ_flag 
Br1 C63 1.890(2) . ? 
O1 C1 1.388(3) . ? 
O1 C2 1.405(3) . ? 
O2 C2 1.184(3) . ? 
O3 C5 1.426(3) . ? 
O3 H3 0.8400 . ? 
O4 C8 1.193(3) . ? 
O5 C11 1.200(3) . ? 
O6 C14 1.206(3) . ? 
O7 C17 1.435(3) . ? 
O7 O8 1.484(2) . ? 
O8 C66 1.454(3) . ? 
N1 C1 1.260(3) . ? 
N1 C60 1.418(3) . ? 
C1 C4 1.463(3) . ? 
C2 C3 1.489(4) . ? 
C3 C4 1.333(3) . ? 
C3 C17 1.509(3) . ? 
C4 C5 1.514(3) . ? 
C5 C19 1.523(3) . ? 
C5 C6 1.571(4) . ? 
C6 C7 1.370(4) . ? 
C6 C21 1.456(4) . ? 
C7 C24 1.454(4) . ? 
C7 C8 1.520(4) . ? 
C8 C9 1.518(4) . ? 
C9 C10 1.378(4) . ? 
C9 C25 1.431(4) . ? 
C10 C28 1.433(4) . ? 
C10 C11 1.511(4) . ? 
C11 C12 1.525(4) . ? 
C12 C13 1.375(4) . ? 
C12 C29 1.445(4) . ? 
C13 C32 1.431(4) . ? 
C13 C14 1.510(4) . ? 
C14 C15 1.513(4) . ? 
C15 C16 1.375(4) . ? 
C15 C33 1.447(3) . ? 
C16 C36 1.455(4) . ? 
C16 C17 1.553(3) . ? 
C17 C18 1.523(3) . ? 
C18 C19 1.356(3) . ? 
C18 C37 1.429(3) . ? 
C19 C20 1.432(4) . ? 
C20 C39 1.391(4) . ? 
C20 C21 1.441(4) . ? 
C21 C22 1.392(4) . ? 
C22 C41 1.442(4) . ? 
C22 C23 1.442(4) . ? 
C23 C24 1.387(4) . ? 
C23 C43 1.449(4) . ? 
C24 C25 1.444(4) . ? 
C25 C26 1.385(4) . ? 
C26 C44 1.448(4) . ? 
C26 C27 1.448(4) . ? 
C27 C28 1.381(4) . ? 
C27 C46 1.446(4) . ? 
C28 C29 1.455(4) . ? 
C29 C30 1.380(4) . ? 
C30 C31 1.433(4) . ? 
C30 C47 1.454(4) . ? 
C31 C32 1.391(4) . ? 
C31 C49 1.449(4) . ? 
C32 C33 1.436(4) . ? 
C33 C34 1.387(4) . ? 
C34 C35 1.437(4) . ? 
C34 C50 1.440(4) . ? 
C35 C36 1.390(4) . ? 
C35 C52 1.454(4) . ? 
C36 C37 1.447(4) . ? 
C37 C38 1.391(4) . ? 
C38 C53 1.440(4) . ? 
C38 C39 1.443(4) . ? 
C39 C40 1.439(4) . ? 
C40 C41 1.389(4) . ? 
C40 C54 1.449(4) . ? 
C41 C42 1.440(4) . ? 
C42 C56 1.409(4) . ? 
C42 C43 1.441(4) . ? 
C43 C44 1.378(4) . ? 
C44 C45 1.455(4) . ? 
C45 C57 1.384(4) . ? 
C45 C46 1.447(4) . ? 
C46 C47 1.394(4) . ? 
C47 C48 1.445(4) . ? 
C48 C58 1.395(4) . ? 
C48 C49 1.450(4) . ? 
C49 C50 1.384(4) . ? 
C50 C51 1.446(4) . ? 
C51 C59 1.391(4) . ? 
C51 C52 1.445(4) . ? 
C52 C53 1.391(4) . ? 
C53 C54 1.448(4) . ? 
C54 C55 1.379(4) . ? 
C55 C56 1.446(4) . ? 
C55 C59 1.452(4) . ? 
C56 C57 1.445(4) . ? 
C57 C58 1.448(4) . ? 
C58 C59 1.448(4) . ? 
C60 C65 1.392(4) . ? 
C60 C61 1.393(4) . ? 
C61 C62 1.377(4) . ? 
C61 H61 0.9500 . ? 
C62 C63 1.383(4) . ? 
C62 H62 0.9500 . ? 
C63 C64 1.375(4) . ? 
C64 C65 1.376(4) . ? 
C64 H64 0.9500 . ? 
C65 H65 0.9500 . ? 
C66 C68 1.509(4) . ? 
C66 C69 1.524(4) . ? 
C66 C67 1.532(4) . ? 
C67 H67A 0.9800 . ? 
C67 H67B 0.9800 . ? 
C67 H67C 0.9800 . ? 
C68 H68A 0.9800 . ? 
C68 H68B 0.9800 . ? 
C68 H68C 0.9800 . ? 
C69 H69A 0.9800 . ? 
C69 H69B 0.9800 . ? 
C69 H69C 0.9800 . ? 
C70 Cl3 1.744(4) . ? 
C70 Cl1 1.748(3) . ? 
C70 Cl2 1.754(3) . ? 
C70 D70 1.0000 . ? 
C71 Cl5 1.741(3) . ? 
C71 Cl6 1.742(3) . ? 
C71 Cl4 1.746(3) . ? 
C71 D71 1.0000 . ? 
C72 Cl72 1.609(6) . ? 
C72 Cl81 1.643(8) . ? 
C72 Cl92 1.718(6) . ? 
C72 Cl71 1.775(4) . ? 
C72 Cl91 1.800(5) . ? 
C72 Cl82 1.882(8) . ? 
C72 D72 1.0000 . ? 
 
loop_ 
 _geom_angle_atom_site_label_1 
 _geom_angle_atom_site_label_2 
 _geom_angle_atom_site_label_3 
 _geom_angle 
 _geom_angle_site_symmetry_1 
 _geom_angle_site_symmetry_3 
 _geom_angle_publ_flag 
C1 O1 C2 108.32(19) . . ? 
C5 O3 H3 109.5 . . ? 
C17 O7 O8 104.45(16) . . ? 
C66 O8 O7 106.12(17) . . ? 
C1 N1 C60 124.3(2) . . ? 
N1 C1 O1 125.5(2) . . ? 
N1 C1 C4 125.9(2) . . ? 
O1 C1 C4 108.3(2) . . ? 
O2 C2 O1 120.6(2) . . ? 
O2 C2 C3 133.2(2) . . ? 
O1 C2 C3 106.1(2) . . ? 
C4 C3 C2 108.7(2) . . ? 
C4 C3 C17 126.0(2) . . ? 
C2 C3 C17 123.6(2) . . ? 
C3 C4 C1 108.1(2) . . ? 
C3 C4 C5 126.5(2) . . ? 
C1 C4 C5 123.2(2) . . ? 
O3 C5 C4 109.1(2) . . ? 
O3 C5 C19 108.8(2) . . ? 
C4 C5 C19 108.10(19) . . ? 
O3 C5 C6 107.77(18) . . ? 
C4 C5 C6 122.7(2) . . ? 
C19 C5 C6 99.55(19) . . ? 
C7 C6 C21 118.4(2) . . ? 
C7 C6 C5 133.9(2) . . ? 
C21 C6 C5 105.6(2) . . ? 
C6 C7 C24 119.1(2) . . ? 
C6 C7 C8 129.1(2) . . ? 
C24 C7 C8 106.7(2) . . ? 
O4 C8 C9 127.2(3) . . ? 
O4 C8 C7 128.3(3) . . ? 
C9 C8 C7 104.2(2) . . ? 
C10 C9 C25 119.2(3) . . ? 
C10 C9 C8 125.0(2) . . ? 
C25 C9 C8 108.1(2) . . ? 
C9 C10 C28 118.7(3) . . ? 
C9 C10 C11 126.1(3) . . ? 
C28 C10 C11 107.8(2) . . ? 
O5 C11 C10 129.1(3) . . ? 
O5 C11 C12 128.1(3) . . ? 
C10 C11 C12 102.9(2) . . ? 
C13 C12 C29 118.8(3) . . ? 
C13 C12 C11 126.8(2) . . ? 
C29 C12 C11 106.9(2) . . ? 
C12 C13 C32 119.0(2) . . ? 
C12 C13 C14 125.4(2) . . ? 
C32 C13 C14 107.6(2) . . ? 
O6 C14 C13 127.5(2) . . ? 
O6 C14 C15 127.4(2) . . ? 
C13 C14 C15 104.8(2) . . ? 
C16 C15 C33 119.5(2) . . ? 
C16 C15 C14 129.6(2) . . ? 
C33 C15 C14 106.5(2) . . ? 
C15 C16 C36 117.9(2) . . ? 
C15 C16 C17 133.0(2) . . ? 
C36 C16 C17 105.9(2) . . ? 
O7 C17 C3 110.77(19) . . ? 
O7 C17 C18 112.2(2) . . ? 
C3 C17 C18 108.42(19) . . ? 
O7 C17 C16 102.10(18) . . ? 
C3 C17 C16 123.0(2) . . ? 
C18 C17 C16 99.89(19) . . ? 
C19 C18 C37 119.6(2) . . ? 
C19 C18 C17 125.3(2) . . ? 
C37 C18 C17 109.1(2) . . ? 
C18 C19 C20 119.6(2) . . ? 
C18 C19 C5 125.4(2) . . ? 
C20 C19 C5 109.2(2) . . ? 
C39 C20 C19 121.6(2) . . ? 
C39 C20 C21 120.1(2) . . ? 
C19 C20 C21 108.0(2) . . ? 
C22 C21 C20 119.2(2) . . ? 
C22 C21 C6 122.5(2) . . ? 
C20 C21 C6 109.2(2) . . ? 
C21 C22 C41 120.5(2) . . ? 
C21 C22 C23 119.0(2) . . ? 
C41 C22 C23 108.1(2) . . ? 
C24 C23 C22 118.0(2) . . ? 
C24 C23 C43 120.6(3) . . ? 
C22 C23 C43 108.0(2) . . ? 
C23 C24 C25 119.6(3) . . ? 
C23 C24 C7 122.9(3) . . ? 
C25 C24 C7 109.3(2) . . ? 
C26 C25 C9 122.4(3) . . ? 
C26 C25 C24 119.5(3) . . ? 
C9 C25 C24 109.2(2) . . ? 
C25 C26 C44 120.8(3) . . ? 
C25 C26 C27 118.0(3) . . ? 
C44 C26 C27 108.2(3) . . ? 
C28 C27 C46 121.6(3) . . ? 
C28 C27 C26 118.9(3) . . ? 
C46 C27 C26 107.9(3) . . ? 
C27 C28 C10 122.2(3) . . ? 
C27 C28 C29 119.3(3) . . ? 
C10 C28 C29 108.7(2) . . ? 
C30 C29 C12 121.8(3) . . ? 
C30 C29 C28 119.6(3) . . ? 
C12 C29 C28 108.6(2) . . ? 
C29 C30 C31 119.1(2) . . ? 
C29 C30 C47 120.9(3) . . ? 
C31 C30 C47 107.9(3) . . ? 
C32 C31 C30 118.4(3) . . ? 
C32 C31 C49 120.0(3) . . ? 
C30 C31 C49 108.4(2) . . ? 
C31 C32 C13 122.2(3) . . ? 
C31 C32 C33 120.0(2) . . ? 
C13 C32 C33 109.3(2) . . ? 
C34 C33 C32 119.8(2) . . ? 
C34 C33 C15 122.4(2) . . ? 
C32 C33 C15 109.6(2) . . ? 
C33 C34 C35 118.6(2) . . ? 
C33 C34 C50 120.5(3) . . ? 
C35 C34 C50 108.8(2) . . ? 
C36 C35 C34 118.7(2) . . ? 
C36 C35 C52 121.1(2) . . ? 
C34 C35 C52 107.6(2) . . ? 
C35 C36 C37 118.9(2) . . ? 
C35 C36 C16 122.7(2) . . ? 
C37 C36 C16 109.0(2) . . ? 
C38 C37 C18 121.6(2) . . ? 
C38 C37 C36 120.0(2) . . ? 
C18 C37 C36 107.7(2) . . ? 
C37 C38 C53 120.8(2) . . ? 
C37 C38 C39 118.6(2) . . ? 
C53 C38 C39 107.8(2) . . ? 
C20 C39 C40 120.4(2) . . ? 
C20 C39 C38 118.4(2) . . ? 
C40 C39 C38 108.2(2) . . ? 
C41 C40 C39 119.7(2) . . ? 
C41 C40 C54 119.3(3) . . ? 
C39 C40 C54 108.2(2) . . ? 
C40 C41 C42 120.6(2) . . ? 
C40 C41 C22 119.9(2) . . ? 
C42 C41 C22 107.8(2) . . ? 
C56 C42 C41 119.8(2) . . ? 
C56 C42 C43 119.4(3) . . ? 
C41 C42 C43 108.5(2) . . ? 
C44 C43 C42 120.6(3) . . ? 
C44 C43 C23 119.7(3) . . ? 
C42 C43 C23 107.5(2) . . ? 
C43 C44 C26 119.6(3) . . ? 
C43 C44 C45 120.1(3) . . ? 
C26 C44 C45 107.8(3) . . ? 
C57 C45 C46 120.4(3) . . ? 
C57 C45 C44 119.8(3) . . ? 
C46 C45 C44 107.8(3) . . ? 
C47 C46 C27 119.1(3) . . ? 
C47 C46 C45 119.6(3) . . ? 
C27 C46 C45 108.3(2) . . ? 
C46 C47 C48 120.0(3) . . ? 
C46 C47 C30 119.5(3) . . ? 
C48 C47 C30 108.0(2) . . ? 
C58 C48 C47 120.2(3) . . ? 
C58 C48 C49 119.8(3) . . ? 
C47 C48 C49 107.8(2) . . ? 
C50 C49 C31 119.9(2) . . ? 
C50 C49 C48 120.1(3) . . ? 
C31 C49 C48 107.8(2) . . ? 
C49 C50 C34 119.7(3) . . ? 
C49 C50 C51 120.2(2) . . ? 
C34 C50 C51 107.6(2) . . ? 
C59 C51 C52 119.8(3) . . ? 
C59 C51 C50 120.1(3) . . ? 
C52 C51 C50 108.1(2) . . ? 
C53 C52 C51 120.4(2) . . ? 
C53 C52 C35 119.2(2) . . ? 
C51 C52 C35 107.8(2) . . ? 
C52 C53 C38 119.8(2) . . ? 
C52 C53 C54 119.6(3) . . ? 
C38 C53 C54 108.5(2) . . ? 
C55 C54 C53 120.4(3) . . ? 
C55 C54 C40 120.7(2) . . ? 
C53 C54 C40 107.2(2) . . ? 
C54 C55 C56 120.2(3) . . ? 
C54 C55 C59 120.1(3) . . ? 
C56 C55 C59 107.4(3) . . ? 
C42 C56 C57 119.9(3) . . ? 
C42 C56 C55 119.4(3) . . ? 
C57 C56 C55 108.8(2) . . ? 
C45 C57 C56 120.2(3) . . ? 
C45 C57 C58 120.1(3) . . ? 
C56 C57 C58 107.6(2) . . ? 
C48 C58 C57 119.6(3) . . ? 
C48 C58 C59 120.0(2) . . ? 
C57 C58 C59 108.2(3) . . ? 
C51 C59 C58 119.8(3) . . ? 
C51 C59 C55 119.8(3) . . ? 
C58 C59 C55 108.1(2) . . ? 
C65 C60 C61 118.9(2) . . ? 
C65 C60 N1 115.3(2) . . ? 
C61 C60 N1 125.7(2) . . ? 
C62 C61 C60 120.4(2) . . ? 
C62 C61 H61 119.8 . . ? 
C60 C61 H61 119.8 . . ? 
C61 C62 C63 119.5(2) . . ? 
C61 C62 H62 120.2 . . ? 
C63 C62 H62 120.2 . . ? 
C64 C63 C62 121.1(2) . . ? 
C64 C63 Br1 118.23(19) . . ? 
C62 C63 Br1 120.7(2) . . ? 
C63 C64 C65 119.3(2) . . ? 
C63 C64 H64 120.3 . . ? 
C65 C64 H64 120.3 . . ? 
C64 C65 C60 120.8(2) . . ? 
C64 C65 H65 119.6 . . ? 
C60 C65 H65 119.6 . . ? 
O8 C66 C68 110.7(2) . . ? 
O8 C66 C69 108.5(2) . . ? 
C68 C66 C69 113.7(3) . . ? 
O8 C66 C67 101.2(2) . . ? 
C68 C66 C67 111.2(3) . . ? 
C69 C66 C67 111.0(2) . . ? 
C66 C67 H67A 109.5 . . ? 
C66 C67 H67B 109.5 . . ? 
H67A C67 H67B 109.5 . . ? 
C66 C67 H67C 109.5 . . ? 
H67A C67 H67C 109.5 . . ? 
H67B C67 H67C 109.5 . . ? 
C66 C68 H68A 109.5 . . ? 
C66 C68 H68B 109.5 . . ? 
H68A C68 H68B 109.5 . . ? 
C66 C68 H68C 109.5 . . ? 
H68A C68 H68C 109.5 . . ? 
H68B C68 H68C 109.5 . . ? 
C66 C69 H69A 109.5 . . ? 
C66 C69 H69B 109.5 . . ? 
H69A C69 H69B 109.5 . . ? 
C66 C69 H69C 109.5 . . ? 
H69A C69 H69C 109.5 . . ? 
H69B C69 H69C 109.5 . . ? 
Cl3 C70 Cl1 110.24(19) . . ? 
Cl3 C70 Cl2 110.98(19) . . ? 
Cl1 C70 Cl2 110.21(18) . . ? 
Cl3 C70 D70 108.4 . . ? 
Cl1 C70 D70 108.4 . . ? 
Cl2 C70 D70 108.4 . . ? 
Cl5 C71 Cl6 110.19(18) . . ? 
Cl5 C71 Cl4 109.62(17) . . ? 
Cl6 C71 Cl4 110.58(18) . . ? 
Cl5 C71 D71 108.8 . . ? 
Cl6 C71 D71 108.8 . . ? 
Cl4 C71 D71 108.8 . . ? 
Cl72 C72 Cl81 117.3(4) . . ? 
Cl72 C72 Cl92 119.2(4) . . ? 
Cl81 C72 Cl92 90.9(4) . . ? 
Cl72 C72 Cl71 0.5(3) . . ? 
Cl81 C72 Cl71 117.5(4) . . ? 
Cl92 C72 Cl71 118.7(3) . . ? 
Cl72 C72 Cl91 105.5(3) . . ? 
Cl81 C72 Cl91 112.3(4) . . ? 
Cl92 C72 Cl91 21.4(3) . . ? 
Cl71 C72 Cl91 105.0(2) . . ? 
Cl72 C72 Cl82 103.8(4) . . ? 
Cl81 C72 Cl82 14.9(5) . . ? 
Cl92 C72 Cl82 103.8(4) . . ? 
Cl71 C72 Cl82 104.1(3) . . ? 
Cl91 C72 Cl82 124.7(3) . . ? 
Cl72 C72 D72 106.9 . . ? 
Cl81 C72 D72 107.2 . . ? 
Cl92 C72 D72 114.5 . . ? 
Cl71 C72 D72 107.2 . . ? 
Cl91 C72 D72 107.2 . . ? 
Cl82 C72 D72 107.6 . . ? 
 
loop_ 
 _geom_torsion_atom_site_label_1 
 _geom_torsion_atom_site_label_2 
 _geom_torsion_atom_site_label_3 
 _geom_torsion_atom_site_label_4 
 _geom_torsion 
 _geom_torsion_site_symmetry_1 
 _geom_torsion_site_symmetry_2 
 _geom_torsion_site_symmetry_3 
 _geom_torsion_site_symmetry_4 
 _geom_torsion_publ_flag 
C17 O7 O8 C66 -176.75(18) . . . . ? 
C60 N1 C1 O1 -3.9(4) . . . . ? 
C60 N1 C1 C4 -176.3(2) . . . . ? 
C2 O1 C1 N1 -166.6(2) . . . . ? 
C2 O1 C1 C4 7.0(3) . . . . ? 
C1 O1 C2 O2 169.7(2) . . . . ? 
C1 O1 C2 C3 -6.8(3) . . . . ? 
O2 C2 C3 C4 -171.7(3) . . . . ? 
O1 C2 C3 C4 4.1(3) . . . . ? 
O2 C2 C3 C17 -5.9(5) . . . . ? 
O1 C2 C3 C17 170.0(2) . . . . ? 
C2 C3 C4 C1 0.1(3) . . . . ? 
C17 C3 C4 C1 -165.3(2) . . . . ? 
C2 C3 C4 C5 163.6(2) . . . . ? 
C17 C3 C4 C5 -1.9(4) . . . . ? 
N1 C1 C4 C3 169.2(3) . . . . ? 
O1 C1 C4 C3 -4.3(3) . . . . ? 
N1 C1 C4 C5 5.0(4) . . . . ? 
O1 C1 C4 C5 -168.5(2) . . . . ? 
C3 C4 C5 O3 -120.5(3) . . . . ? 
C1 C4 C5 O3 40.6(3) . . . . ? 
C3 C4 C5 C19 -2.4(4) . . . . ? 
C1 C4 C5 C19 158.8(2) . . . . ? 
C3 C4 C5 C6 112.3(3) . . . . ? 
C1 C4 C5 C6 -86.6(3) . . . . ? 
O3 C5 C6 C7 -112.2(3) . . . . ? 
C4 C5 C6 C7 15.6(4) . . . . ? 
C19 C5 C6 C7 134.4(3) . . . . ? 
O3 C5 C6 C21 85.5(2) . . . . ? 
C4 C5 C6 C21 -146.7(2) . . . . ? 
C19 C5 C6 C21 -27.8(2) . . . . ? 
C21 C6 C7 C24 0.3(3) . . . . ? 
C5 C6 C7 C24 -160.2(2) . . . . ? 
C21 C6 C7 C8 151.5(2) . . . . ? 
C5 C6 C7 C8 -8.9(5) . . . . ? 
C6 C7 C8 O4 35.8(4) . . . . ? 
C24 C7 C8 O4 -170.2(3) . . . . ? 
C6 C7 C8 C9 -138.5(3) . . . . ? 
C24 C7 C8 C9 15.5(2) . . . . ? 
O4 C8 C9 C10 -39.8(4) . . . . ? 
C7 C8 C9 C10 134.6(3) . . . . ? 
O4 C8 C9 C25 171.3(3) . . . . ? 
C7 C8 C9 C25 -14.3(3) . . . . ? 
C25 C9 C10 C28 3.3(4) . . . . ? 
C8 C9 C10 C28 -142.4(3) . . . . ? 
C25 C9 C10 C11 149.5(3) . . . . ? 
C8 C9 C10 C11 3.8(4) . . . . ? 
C9 C10 C11 O5 51.6(4) . . . . ? 
C28 C10 C11 O5 -159.2(3) . . . . ? 
C9 C10 C11 C12 -127.5(3) . . . . ? 
C28 C10 C11 C12 21.7(3) . . . . ? 
O5 C11 C12 C13 -51.9(4) . . . . ? 
C10 C11 C12 C13 127.2(3) . . . . ? 
O5 C11 C12 C29 159.2(3) . . . . ? 
C10 C11 C12 C29 -21.8(3) . . . . ? 
C29 C12 C13 C32 -3.3(4) . . . . ? 
C11 C12 C13 C32 -149.0(3) . . . . ? 
C29 C12 C13 C14 141.8(3) . . . . ? 
C11 C12 C13 C14 -3.9(4) . . . . ? 
C12 C13 C14 O6 38.9(4) . . . . ? 
C32 C13 C14 O6 -172.8(2) . . . . ? 
C12 C13 C14 C15 -135.0(3) . . . . ? 
C32 C13 C14 C15 13.3(2) . . . . ? 
O6 C14 C15 C16 -32.7(4) . . . . ? 
C13 C14 C15 C16 141.2(2) . . . . ? 
O6 C14 C15 C33 171.5(2) . . . . ? 
C13 C14 C15 C33 -14.6(2) . . . . ? 
C33 C15 C16 C36 2.2(3) . . . . ? 
C14 C15 C16 C36 -150.9(2) . . . . ? 
C33 C15 C16 C17 158.8(2) . . . . ? 
C14 C15 C16 C17 5.7(4) . . . . ? 
O8 O7 C17 C3 -73.3(2) . . . . ? 
O8 O7 C17 C18 48.0(2) . . . . ? 
O8 O7 C17 C16 154.14(17) . . . . ? 
C4 C3 C17 O7 128.5(3) . . . . ? 
C2 C3 C17 O7 -34.8(3) . . . . ? 
C4 C3 C17 C18 5.0(3) . . . . ? 
C2 C3 C17 C18 -158.4(2) . . . . ? 
C4 C3 C17 C16 -110.6(3) . . . . ? 
C2 C3 C17 C16 86.0(3) . . . . ? 
C15 C16 C17 O7 113.5(3) . . . . ? 
C36 C16 C17 O7 -87.8(2) . . . . ? 
C15 C16 C17 C3 -11.3(4) . . . . ? 
C36 C16 C17 C3 147.3(2) . . . . ? 
C15 C16 C17 C18 -131.0(3) . . . . ? 
C36 C16 C17 C18 27.6(2) . . . . ? 
O7 C17 C18 C19 -126.8(2) . . . . ? 
C3 C17 C18 C19 -4.1(3) . . . . ? 
C16 C17 C18 C19 125.7(3) . . . . ? 
O7 C17 C18 C37 80.6(2) . . . . ? 
C3 C17 C18 C37 -156.7(2) . . . . ? 
C16 C17 C18 C37 -26.9(2) . . . . ? 
C37 C18 C19 C20 -0.1(4) . . . . ? 
C17 C18 C19 C20 -150.1(2) . . . . ? 
C37 C18 C19 C5 150.1(2) . . . . ? 
C17 C18 C19 C5 0.2(4) . . . . ? 
O3 C5 C19 C18 121.4(3) . . . . ? 
C4 C5 C19 C18 3.2(3) . . . . ? 
C6 C5 C19 C18 -126.0(3) . . . . ? 
O3 C5 C19 C20 -85.7(2) . . . . ? 
C4 C5 C19 C20 156.0(2) . . . . ? 
C6 C5 C19 C20 26.8(2) . . . . ? 
C18 C19 C20 C39 -6.4(4) . . . . ? 
C5 C19 C20 C39 -161.0(2) . . . . ? 
C18 C19 C20 C21 138.5(2) . . . . ? 
C5 C19 C20 C21 -16.2(3) . . . . ? 
C39 C20 C21 C22 -5.5(4) . . . . ? 
C19 C20 C21 C22 -151.0(2) . . . . ? 
C39 C20 C21 C6 142.3(2) . . . . ? 
C19 C20 C21 C6 -3.1(3) . . . . ? 
C7 C6 C21 C22 1.4(4) . . . . ? 
C5 C6 C21 C22 166.9(2) . . . . ? 
C7 C6 C21 C20 -145.2(2) . . . . ? 
C5 C6 C21 C20 20.3(3) . . . . ? 
C20 C21 C22 C41 5.0(4) . . . . ? 
C6 C21 C22 C41 -138.4(3) . . . . ? 
C20 C21 C22 C23 142.7(2) . . . . ? 
C6 C21 C22 C23 -0.7(4) . . . . ? 
C21 C22 C23 C24 -1.6(4) . . . . ? 
C41 C22 C23 C24 140.8(2) . . . . ? 
C21 C22 C23 C43 -142.8(2) . . . . ? 
C41 C22 C23 C43 -0.4(3) . . . . ? 
C22 C23 C24 C25 -141.8(2) . . . . ? 
C43 C23 C24 C25 -5.7(4) . . . . ? 
C22 C23 C24 C7 3.3(4) . . . . ? 
C43 C23 C24 C7 139.5(3) . . . . ? 
C6 C7 C24 C23 -2.6(4) . . . . ? 
C8 C7 C24 C23 -159.7(2) . . . . ? 
C6 C7 C24 C25 145.6(2) . . . . ? 
C8 C7 C24 C25 -11.5(3) . . . . ? 
C10 C9 C25 C26 3.7(4) . . . . ? 
C8 C9 C25 C26 154.7(2) . . . . ? 
C10 C9 C25 C24 -143.2(2) . . . . ? 
C8 C9 C25 C24 7.7(3) . . . . ? 
C23 C24 C25 C26 3.8(3) . . . . ? 
C7 C24 C25 C26 -145.6(2) . . . . ? 
C23 C24 C25 C9 151.8(2) . . . . ? 
C7 C24 C25 C9 2.4(3) . . . . ? 
C9 C25 C26 C44 -143.5(3) . . . . ? 
C24 C25 C26 C44 0.2(4) . . . . ? 
C9 C25 C26 C27 -6.7(4) . . . . ? 
C24 C25 C26 C27 137.0(3) . . . . ? 
C25 C26 C27 C28 2.6(4) . . . . ? 
C44 C26 C27 C28 144.3(3) . . . . ? 
C25 C26 C27 C46 -141.2(2) . . . . ? 
C44 C26 C27 C46 0.5(3) . . . . ? 
C46 C27 C28 C10 143.1(3) . . . . ? 
C26 C27 C28 C10 4.4(4) . . . . ? 
C46 C27 C28 C29 1.2(4) . . . . ? 
C26 C27 C28 C29 -137.5(3) . . . . ? 
C9 C10 C28 C27 -7.5(4) . . . . ? 
C11 C10 C28 C27 -159.3(2) . . . . ? 
C9 C10 C28 C29 138.0(2) . . . . ? 
C11 C10 C28 C29 -13.9(3) . . . . ? 
C13 C12 C29 C30 7.7(4) . . . . ? 
C11 C12 C29 C30 159.6(2) . . . . ? 
C13 C12 C29 C28 -137.5(3) . . . . ? 
C11 C12 C29 C28 14.3(3) . . . . ? 
C27 C28 C29 C30 0.1(4) . . . . ? 
C10 C28 C29 C30 -146.5(3) . . . . ? 
C27 C28 C29 C12 146.2(3) . . . . ? 
C10 C28 C29 C12 -0.4(3) . . . . ? 
C12 C29 C30 C31 -4.6(4) . . . . ? 
C28 C29 C30 C31 137.0(3) . . . . ? 
C12 C29 C30 C47 -142.7(3) . . . . ? 
C28 C29 C30 C47 -1.1(4) . . . . ? 
C29 C30 C31 C32 -2.9(4) . . . . ? 
C47 C30 C31 C32 140.1(3) . . . . ? 
C29 C30 C31 C49 -144.0(3) . . . . ? 
C47 C30 C31 C49 -1.0(3) . . . . ? 
C30 C31 C32 C13 7.3(4) . . . . ? 
C49 C31 C32 C13 143.9(3) . . . . ? 
C30 C31 C32 C33 -137.2(3) . . . . ? 
C49 C31 C32 C33 -0.5(4) . . . . ? 
C12 C13 C32 C31 -4.2(4) . . . . ? 
C14 C13 C32 C31 -154.9(2) . . . . ? 
C12 C13 C32 C33 143.6(2) . . . . ? 
C14 C13 C32 C33 -7.1(3) . . . . ? 
C31 C32 C33 C34 -3.2(4) . . . . ? 
C13 C32 C33 C34 -151.8(2) . . . . ? 
C31 C32 C33 C15 146.2(2) . . . . ? 
C13 C32 C33 C15 -2.4(3) . . . . ? 
C16 C15 C33 C34 0.6(4) . . . . ? 
C14 C15 C33 C34 159.3(2) . . . . ? 
C16 C15 C33 C32 -147.8(2) . . . . ? 
C14 C15 C33 C32 10.9(3) . . . . ? 
C32 C33 C34 C35 143.0(2) . . . . ? 
C15 C33 C34 C35 -2.3(4) . . . . ? 
C32 C33 C34 C50 4.6(4) . . . . ? 
C15 C33 C34 C50 -140.7(2) . . . . ? 
C33 C34 C35 C36 1.2(3) . . . . ? 
C50 C34 C35 C36 144.0(2) . . . . ? 
C33 C34 C35 C52 -141.2(2) . . . . ? 
C50 C34 C35 C52 1.6(3) . . . . ? 
C34 C35 C36 C37 -141.1(2) . . . . ? 
C52 C35 C36 C37 -4.0(4) . . . . ? 
C34 C35 C36 C16 1.6(4) . . . . ? 
C52 C35 C36 C16 138.8(3) . . . . ? 
C15 C16 C36 C35 -3.4(3) . . . . ? 
C17 C16 C36 C35 -165.8(2) . . . . ? 
C15 C16 C36 C37 142.6(2) . . . . ? 
C17 C16 C36 C37 -19.9(3) . . . . ? 
C19 C18 C37 C38 6.3(4) . . . . ? 
C17 C18 C37 C38 160.7(2) . . . . ? 
C19 C18 C37 C36 -138.0(2) . . . . ? 
C17 C18 C37 C36 16.3(3) . . . . ? 
C35 C36 C37 C38 5.0(3) . . . . ? 
C16 C36 C37 C38 -142.4(2) . . . . ? 
C35 C36 C37 C18 150.1(2) . . . . ? 
C16 C36 C37 C18 2.6(3) . . . . ? 
C18 C37 C38 C53 -142.7(3) . . . . ? 
C36 C37 C38 C53 -2.6(4) . . . . ? 
C18 C37 C38 C39 -5.9(4) . . . . ? 
C36 C37 C38 C39 134.2(3) . . . . ? 
C19 C20 C39 C40 143.4(3) . . . . ? 
C21 C20 C39 C40 2.7(4) . . . . ? 
C19 C20 C39 C38 6.6(4) . . . . ? 
C21 C20 C39 C38 -134.1(3) . . . . ? 
C37 C38 C39 C20 -0.5(4) . . . . ? 
C53 C38 C39 C20 141.4(2) . . . . ? 
C37 C38 C39 C40 -142.1(2) . . . . ? 
C53 C38 C39 C40 -0.2(3) . . . . ? 
C20 C39 C40 C41 0.6(4) . . . . ? 
C38 C39 C40 C41 141.3(2) . . . . ? 
C20 C39 C40 C54 -140.8(2) . . . . ? 
C38 C39 C40 C54 -0.1(3) . . . . ? 
C39 C40 C41 C42 -139.7(3) . . . . ? 
C54 C40 C41 C42 -2.5(4) . . . . ? 
C39 C40 C41 C22 -1.2(4) . . . . ? 
C54 C40 C41 C22 136.0(3) . . . . ? 
C21 C22 C41 C40 -1.7(4) . . . . ? 
C23 C22 C41 C40 -143.5(2) . . . . ? 
C21 C22 C41 C42 141.5(2) . . . . ? 
C23 C22 C41 C42 -0.3(3) . . . . ? 
C40 C41 C42 C56 1.7(4) . . . . ? 
C22 C41 C42 C56 -141.2(2) . . . . ? 
C40 C41 C42 C43 143.7(2) . . . . ? 
C22 C41 C42 C43 0.8(3) . . . . ? 
C56 C42 C43 C44 -1.0(4) . . . . ? 
C41 C42 C43 C44 -143.2(2) . . . . ? 
C56 C42 C43 C23 141.2(2) . . . . ? 
C41 C42 C43 C23 -1.0(3) . . . . ? 
C24 C23 C43 C44 3.4(4) . . . . ? 
C22 C23 C43 C44 143.5(2) . . . . ? 
C24 C23 C43 C42 -139.2(2) . . . . ? 
C22 C23 C43 C42 0.9(3) . . . . ? 
C42 C43 C44 C26 138.3(3) . . . . ? 
C23 C43 C44 C26 0.7(4) . . . . ? 
C42 C43 C44 C45 0.9(4) . . . . ? 
C23 C43 C44 C45 -136.8(3) . . . . ? 
C25 C26 C44 C43 -2.5(4) . . . . ? 
C27 C26 C44 C43 -142.9(2) . . . . ? 
C25 C26 C44 C45 139.6(3) . . . . ? 
C27 C26 C44 C45 -0.8(3) . . . . ? 
C43 C44 C45 C57 -0.1(4) . . . . ? 
C26 C44 C45 C57 -142.0(2) . . . . ? 
C43 C44 C45 C46 142.7(2) . . . . ? 
C26 C44 C45 C46 0.8(3) . . . . ? 
C28 C27 C46 C47 -1.3(4) . . . . ? 
C26 C27 C46 C47 141.3(3) . . . . ? 
C28 C27 C46 C45 -142.7(3) . . . . ? 
C26 C27 C46 C45 0.0(3) . . . . ? 
C57 C45 C46 C47 1.0(4) . . . . ? 
C44 C45 C46 C47 -141.5(3) . . . . ? 
C57 C45 C46 C27 142.0(3) . . . . ? 
C44 C45 C46 C27 -0.5(3) . . . . ? 
C27 C46 C47 C48 -137.2(3) . . . . ? 
C45 C46 C47 C48 -0.3(4) . . . . ? 
C27 C46 C47 C30 0.3(4) . . . . ? 
C45 C46 C47 C30 137.2(3) . . . . ? 
C29 C30 C47 C46 1.0(4) . . . . ? 
C31 C30 C47 C46 -141.2(3) . . . . ? 
C29 C30 C47 C48 143.0(3) . . . . ? 
C31 C30 C47 C48 0.8(3) . . . . ? 
C46 C47 C48 C58 -0.6(4) . . . . ? 
C30 C47 C48 C58 -142.4(3) . . . . ? 
C46 C47 C48 C49 141.5(3) . . . . ? 
C30 C47 C48 C49 -0.3(3) . . . . ? 
C32 C31 C49 C50 2.8(4) . . . . ? 
C30 C31 C49 C50 143.2(2) . . . . ? 
C32 C31 C49 C48 -139.6(2) . . . . ? 
C30 C31 C49 C48 0.8(3) . . . . ? 
C58 C48 C49 C50 -0.4(4) . . . . ? 
C47 C48 C49 C50 -142.6(3) . . . . ? 
C58 C48 C49 C31 141.9(3) . . . . ? 
C47 C48 C49 C31 -0.4(3) . . . . ? 
C31 C49 C50 C34 -1.3(4) . . . . ? 
C48 C49 C50 C34 136.5(3) . . . . ? 
C31 C49 C50 C51 -138.7(3) . . . . ? 
C48 C49 C50 C51 -0.9(4) . . . . ? 
C33 C34 C50 C49 -2.4(4) . . . . ? 
C35 C34 C50 C49 -144.3(2) . . . . ? 
C33 C34 C50 C51 139.7(2) . . . . ? 
C35 C34 C50 C51 -2.2(3) . . . . ? 
C49 C50 C51 C59 1.4(4) . . . . ? 
C34 C50 C51 C59 -140.5(2) . . . . ? 
C49 C50 C51 C52 143.9(2) . . . . ? 
C34 C50 C51 C52 2.0(3) . . . . ? 
C59 C51 C52 C53 0.0(4) . . . . ? 
C50 C51 C52 C53 -142.6(2) . . . . ? 
C59 C51 C52 C35 141.6(2) . . . . ? 
C50 C51 C52 C35 -1.1(3) . . . . ? 
C36 C35 C52 C53 0.4(4) . . . . ? 
C34 C35 C52 C53 141.7(2) . . . . ? 
C36 C35 C52 C51 -141.6(2) . . . . ? 
C34 C35 C52 C51 -0.3(3) . . . . ? 
C51 C52 C53 C38 139.4(3) . . . . ? 
C35 C52 C53 C38 2.1(4) . . . . ? 
C51 C52 C53 C54 1.2(4) . . . . ? 
C35 C52 C53 C54 -136.1(3) . . . . ? 
C37 C38 C53 C52 -1.0(4) . . . . ? 
C39 C38 C53 C52 -141.9(2) . . . . ? 
C37 C38 C53 C54 141.3(2) . . . . ? 
C39 C38 C53 C54 0.4(3) . . . . ? 
C52 C53 C54 C55 -1.4(4) . . . . ? 
C38 C53 C54 C55 -143.8(2) . . . . ? 
C52 C53 C54 C40 141.9(2) . . . . ? 
C38 C53 C54 C40 -0.5(3) . . . . ? 
C41 C40 C54 C55 1.9(4) . . . . ? 
C39 C40 C54 C55 143.5(3) . . . . ? 
C41 C40 C54 C53 -141.2(2) . . . . ? 
C39 C40 C54 C53 0.4(3) . . . . ? 
C53 C54 C55 C56 137.8(3) . . . . ? 
C40 C54 C55 C56 -0.5(4) . . . . ? 
C53 C54 C55 C59 0.4(4) . . . . ? 
C40 C54 C55 C59 -138.0(3) . . . . ? 
C41 C42 C56 C57 138.3(3) . . . . ? 
C43 C42 C56 C57 0.3(4) . . . . ? 
C41 C42 C56 C55 -0.3(4) . . . . ? 
C43 C42 C56 C55 -138.3(3) . . . . ? 
C54 C55 C56 C42 -0.3(4) . . . . ? 
C59 C55 C56 C42 141.9(3) . . . . ? 
C54 C55 C56 C57 -143.0(3) . . . . ? 
C59 C55 C56 C57 -0.8(3) . . . . ? 
C46 C45 C57 C56 -138.7(3) . . . . ? 
C44 C45 C57 C56 -0.6(4) . . . . ? 
C46 C45 C57 C58 -0.8(4) . . . . ? 
C44 C45 C57 C58 137.3(3) . . . . ? 
C42 C56 C57 C45 0.5(4) . . . . ? 
C55 C56 C57 C45 143.0(2) . . . . ? 
C42 C56 C57 C58 -142.0(2) . . . . ? 
C55 C56 C57 C58 0.5(3) . . . . ? 
C47 C48 C58 C57 0.8(4) . . . . ? 
C49 C48 C58 C57 -136.9(3) . . . . ? 
C47 C48 C58 C59 138.7(3) . . . . ? 
C49 C48 C58 C59 1.1(4) . . . . ? 
C45 C57 C58 C48 -0.1(4) . . . . ? 
C56 C57 C58 C48 142.5(3) . . . . ? 
C45 C57 C58 C59 -142.5(3) . . . . ? 
C56 C57 C58 C59 0.1(3) . . . . ? 
C52 C51 C59 C58 -138.9(3) . . . . ? 
C50 C51 C59 C58 -0.7(4) . . . . ? 
C52 C51 C59 C55 -1.0(4) . . . . ? 
C50 C51 C59 C55 137.2(3) . . . . ? 
C48 C58 C59 C51 -0.6(4) . . . . ? 
C57 C58 C59 C51 141.7(2) . . . . ? 
C48 C58 C59 C55 -142.8(2) . . . . ? 
C57 C58 C59 C55 -0.6(3) . . . . ? 
C54 C55 C59 C51 0.8(4) . . . . ? 
C56 C55 C59 C51 -141.4(3) . . . . ? 
C54 C55 C59 C58 143.0(3) . . . . ? 
C56 C55 C59 C58 0.8(3) . . . . ? 
C1 N1 C60 C65 153.4(3) . . . . ? 
C1 N1 C60 C61 -28.3(4) . . . . ? 
C65 C60 C61 C62 -1.7(4) . . . . ? 
N1 C60 C61 C62 -179.9(2) . . . . ? 
C60 C61 C62 C63 0.9(4) . . . . ? 
C61 C62 C63 C64 -0.2(4) . . . . ? 
C61 C62 C63 Br1 179.37(19) . . . . ? 
C62 C63 C64 C65 0.2(4) . . . . ? 
Br1 C63 C64 C65 -179.4(2) . . . . ? 
C63 C64 C65 C60 -1.0(4) . . . . ? 
C61 C60 C65 C64 1.7(4) . . . . ? 
N1 C60 C65 C64 -179.9(2) . . . . ? 
O7 O8 C66 C68 51.3(3) . . . . ? 
O7 O8 C66 C69 -74.1(2) . . . . ? 
O7 O8 C66 C67 169.17(19) . . . . ? 
 
loop_ 
 _geom_hbond_atom_site_label_D 
 _geom_hbond_atom_site_label_H 
 _geom_hbond_atom_site_label_A 
 _geom_hbond_distance_DH 
 _geom_hbond_distance_HA 
 _geom_hbond_distance_DA 
 _geom_hbond_angle_DHA 
 _geom_hbond_site_symmetry_A 
C70 D70 O2  1.00 2.43 3.334(4) 149.5 . 
C71 D71 O5  1.00 2.53 3.206(4) 124.3 . 
C71 D71 O6  1.00 2.45 3.364(4) 151.6 . 
C72 D72 O5  1.00 2.45 3.318(4) 145.5 . 
O3 H3 N1  0.84 2.28 2.877(3) 128.5 . 
 
_diffrn_measured_fraction_theta_max    0.989 
_diffrn_reflns_theta_full              27.52 
_diffrn_measured_fraction_theta_full   0.989 
_refine_diff_density_max    0.505 
_refine_diff_density_min   -0.630 
_refine_diff_density_rms    0.065 
